# Supplementary material
Source: PubMed Central journal article supplement (PMC3459188)
Supplement: NIHMS395895-supplement-1_si_001.pdf [file NIHMS395895-supplement-1_si_001.pdf]

## Dynamic Nuclear Polarization of Oxygen-17

Vladimir K. Michaelis<sup>1,2</sup>, Evgeny Markhasin<sup>1,2</sup>, Eugenio Daviso<sup>1,3</sup>, Judith Herzfeld<sup>3</sup>  
and Robert G. Griffin<sup>1,2\*</sup>

<sup>1</sup>Francis Bitter Magnet Laboratory and <sup>2</sup>Department of Chemistry, Massachusetts Institute of Technology, Cambridge, Massachusetts, USA, 02139

<sup>3</sup>Department of Chemistry, Brandeis University, Waltham, Massachusetts, USA, 02453

### Materials and Methods

*a. Sample Preparation:* Samples were prepared by mixing appropriate amounts of *d*<sub>8</sub>-glycerol, D<sub>2</sub>O and 35% to 74% <sup>17</sup>O labeled H<sub>2</sub>O in 60:40 v/v% *d*<sub>8</sub>-glycerol - H<sub>2</sub><sup>17</sup>O; 60:30:10 v/v% *d*<sub>8</sub>-glycerol - D<sub>2</sub>O - H<sub>2</sub><sup>17</sup>O; 60:30:10 v/v% *d*<sub>8</sub>-glycerol - D<sub>2</sub>O - H<sub>2</sub>O with 20 mM TOTAPOL. All isotopes were purchased from Cambridge isotope laboratories and used without further purification. DNP samples were center-packed into 4 mm (40-50 μl volume) sapphire rotors (Insaco Inc.). Vespel drive tips were cryo-epoxied, and Kel-F spacers were used to center the samples in the rotors.

*b. DNP-enhanced solid-state NMR spectroscopy:* DNP experiments were performed using a custom-built instrument, consisting of a 140 GHz gyrotron and a 212 MHz (<sup>1</sup>H frequency) MAS NMR spectrometer (courtesy of D. Ruben). Spectra were recorded using a custom-built 4 mm double resonant (<sup>1</sup>H and <sup>17</sup>O) circuit and a 4 mm Revolution NMR Kel-F stator. Experiments were performed under static conditions at temperatures < 88 K.

All one-dimensional experiments were acquired using cross-polarization echo experiment. High-power decoupling of 80 to 90 kHz was applied during acquisition for all experiments. Contact times were varied between 0.3 and 3 ms, while <sup>17</sup>O Hartmann-Hahn match condition was optimized to a  $\gamma B_1 = 35$  kHz. Recycle delays were set to 8 seconds. CP-QCPMG<sup>1</sup> was used to determine the spin-spin relaxation (*T*<sub>2</sub>). <sup>17</sup>O{<sup>1</sup>H} SEDOR experiments were recorded using similar parameters as the ones described above with 16 co-added transients and a recycle delay of 6 s. Fixed time SEDOR was implemented using a 5 μs increment on the <sup>1</sup>H channel. Two-dimensional <sup>17</sup>O{<sup>1</sup>H} HETCOR and HETCOR-QCPMG experiments were recorded using 64 and 8 co-added transients, a dwell time of 1

to 10  $\mu$ s and 40 to 64  $t_1$  points. Spectra were referenced relative to liquid water (at 298 K) set to 0 ppm. Spectra were processed within NMRPIPE<sup>2</sup> software<sup>2</sup>.

c. *Calculations:* SIMPSON 3.1<sup>3</sup> simulations were performed using two- to five-spin systems including one <sup>17</sup>O spin and up to four <sup>1</sup>H spins in order to determine the average <sup>1</sup>H-<sup>17</sup>O bond length. Each simulation employed powder averaging over ZCW986 crystallite orientations and a full set of dipolar coupling tensors prepared using the SIMMOL software.<sup>4</sup> On average, a three-spin simulation took five minutes per 100 iterations while running in parallel on 8 - 2.66 GHz cores. All simulations either converged or reached a local optimum after 100-300 iterations. Experimental spectra were simulated using WSolids<sup>5</sup> and SPINEVOLUTION<sup>6</sup> in order to determine the quadrupolar coupling parameters for <sup>17</sup>O.

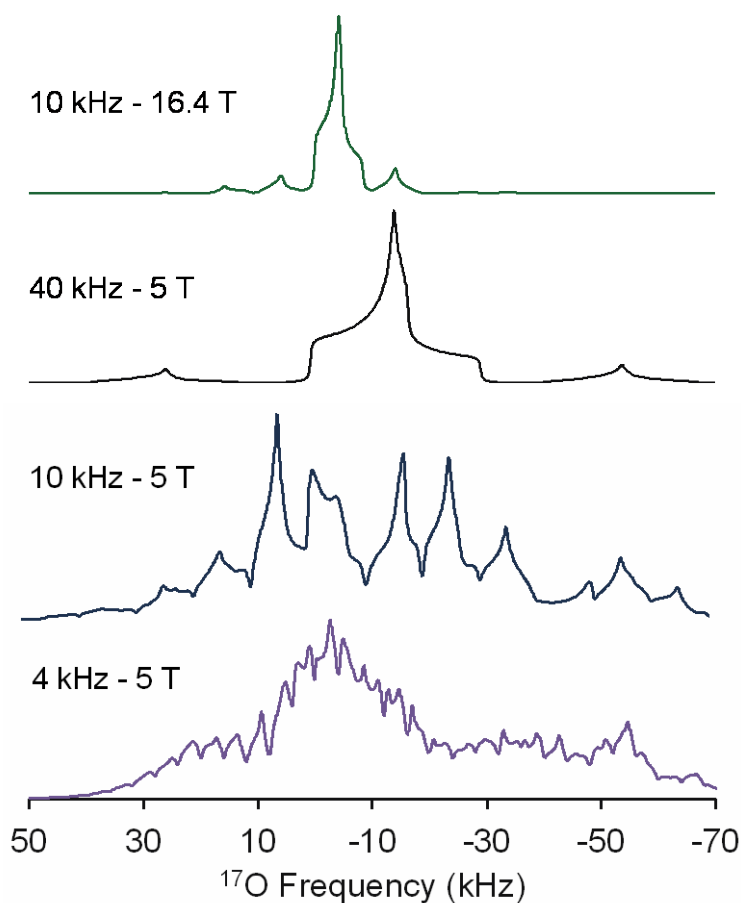

Figure S1: <sup>17</sup>O MAS NMR SPINEVOLUTION simulation of a water site ( $C_Q = 6.8$  MHz,  $\eta = 1$ ,  $\delta_{iso} = 0$  ppm) at 5 T (DNP field in this paper) and 16.4 T (high field). Due to the quadrupolar interaction, MAS (>35 kHz) would be required to isolate the CT from the spinning sidebands. An alternative option is increasing the main magnetic field

whereby the CT is narrowed allowing a lower spinning frequency (i.e., 10 kHz at 16.4 T) to narrow the 2<sup>nd</sup> order powder pattern.

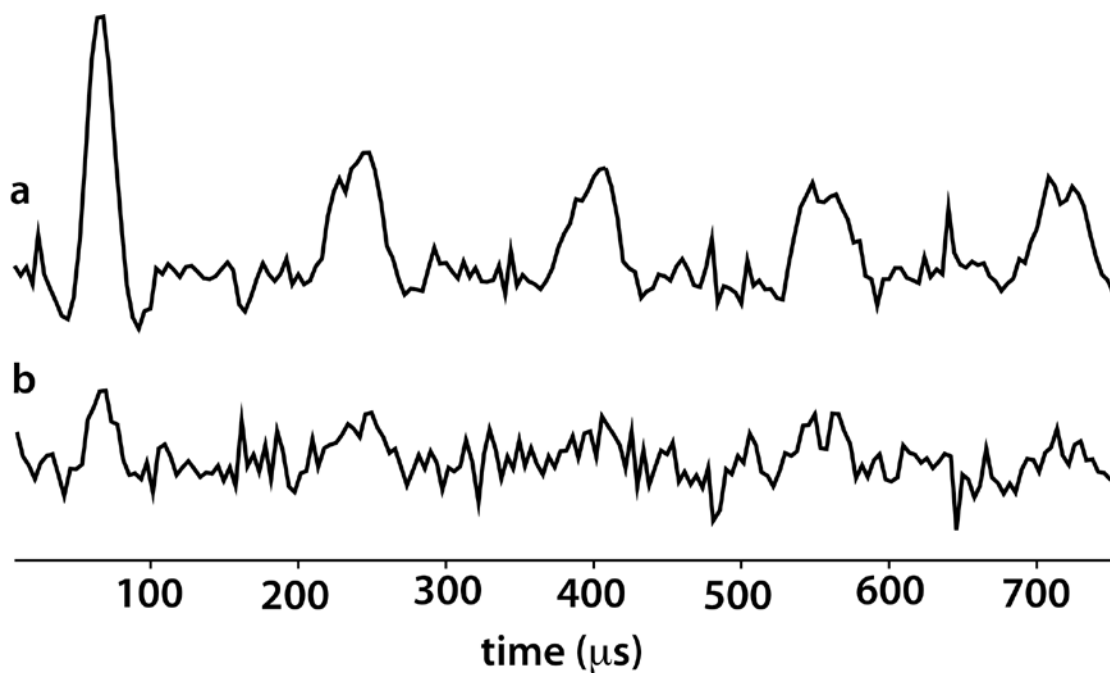

Figure S2:  $^{17}\text{O}$  FID from a CP-CPMG DNP NMR experiment displaying the first five echoes for a 60 d<sup>8</sup>-glycerol/ 30 D<sub>2</sub>O / 10 H<sub>2</sub><sup>17</sup>O using 35% labeled H<sub>2</sub>O and an identical sample with natural abundance (N.A.  $^{17}\text{O}$  - 0.038 %).

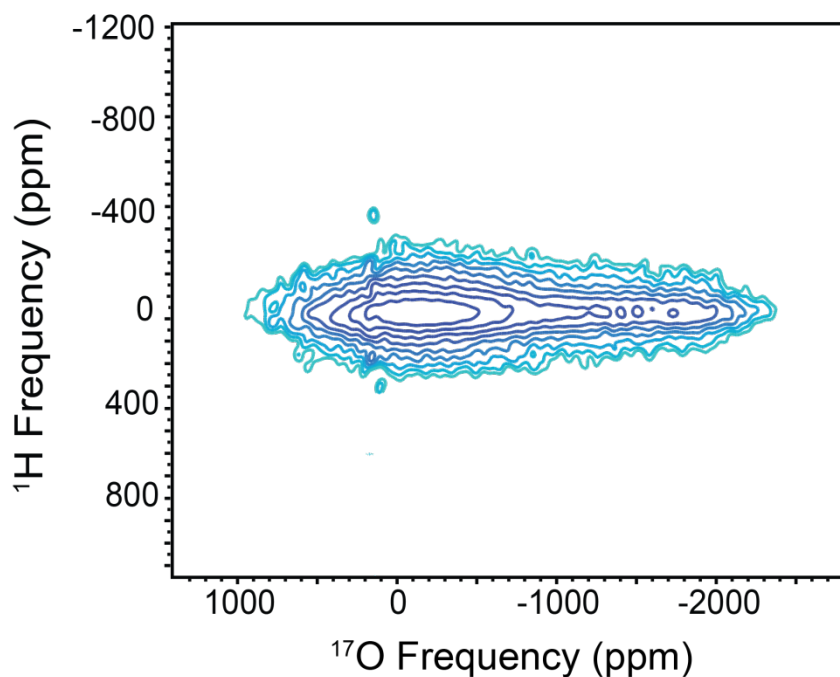

Figure S3:  $^{17}\text{O}\{^1\text{H}\}$  HETCOR spectra of a water/glycerol glass using solid-state DNP NMR.

**References:**

- (1) Martineau, C.; Michaelis, V. K.; Schuller, S.; Kroeker, S., Liquid-Liquid Phase Separation in Model Nuclear Waste Glasses: A Solid-State Double-Resonance NMR Study *Chem. Mater.* **2010**, *22*, 4896-4903.
- (2) Delaglio, F.; Grzesiek, S.; Vuister, G. W.; Zhu, G.; Pfeifer, J.; Bax, A., NMRPIPE - A Multidimensional Spectral Processing System Based on Unix Pipes *Journal of Biomolecular NMR* **1995**, *6*, 277-293.
- (3) Bak, M.; Rasmussen, J. T.; Nielsen, N. C., SIMPSON: A General Simulation Program for Solid-State NMR Spectroscopy *J. Magn. Reson.* **2000**, *147*, 296-330.
- (4) Bak, M.; Schultz, R.; Vosegaard, T.; Nielsen, N. C., Specification and Visualization of Anisotropic Interaction Tensors in Polypeptides and Numerical Simulations in Biological Solid-State NMR *J. Magn. Reson.* **2002**, *154*, 28-45.
- (5) Eichele, K. WSolids NMR Simulation Package; 1.18.8 ed., 2007.

(6) Veshtort, M.; Griffin, R. G., SPINEVOLUTION: A Powerful Tool for Simulations of Solid and Liquid State NMR Experiments *J. Magn. Resonance* **2006**, *178*, 248-282
